# 1 **Poor codon optimality as a signal to degrade transcripts with frameshifts**

2

3 Miquel Àngel Schikora-Tamarit<sup>1</sup>, Lucas B. Carey<sup>1</sup>

4 <sup>1</sup>Systems Bioengineering Program, Department of Experimental and Health Sciences,  
5 Universitat Pompeu Fabra, Barcelona, Spain.

6

## 7 **Corresponding authors:**

8 MAST: [mikischikora@gmail.com](mailto:mikischikora@gmail.com), LBC: [lucas.carey@upf.edu](mailto:lucas.carey@upf.edu)

9 **Keywords:** nonsense-mediated decay, codon bias, frameshifts, mRNA quality, translation

10

## 11 **Abstract**

12 Living organisms are error-prone. Every second a single human cell produces over 100  
13 transcripts with a substitution, frameshift or splicing error. Multiple mRNA quality control  
14 pathways exist to degrade these transcripts. Many of these pathways involve co-translational  
15 regulation of mRNA stability, such as nonsense mediated decay (NMD) and reduced stability  
16 of transcripts with suboptimal codon usage. Recent work has shown the existence of a genetic  
17 link between NMD and codon-usage mediated mRNA decay. Here we present new  
18 computational evidence that, because the codons following most frameshift errors are  
19 suboptimal, removal of mRNAs with such errors may be mediated by degradation of mRNAs  
20 with sub-optimal codons. Thus, most transcripts that contain frameshifts are subject to two  
21 modes of degradation.

22

## 23 **Author summary**

24 Frameshifting errors are common and mRNA quality control pathways, such as nonsense-  
25 mediated decay (NMD), exist to degrade these aberrant transcripts. Recent work has shown

the existence of a genetic link between NMD and codon-usage mediated mRNA decay. Here we present computational evidence that these pathways are synergic for removing frameshifts.

## Introduction

### Frameshifting errors in gene expression

All biochemical pathways are intrinsically stochastic processes. Transcription, splicing, and translation are especially error prone, with error rates 4-6 orders of magnitude higher than that of DNA polymerase (1–6). Such errors can result in single-amino acid substitutions, as well as truncation of the protein due to nonsense mutations or frameshifting errors. The latter can occur due to insertion and deletion events during transcription, splicing errors, and ribosomal slippage during translation (**Figure 1**).

Frameshifts in protein coding genes are likely to be among the most damaging events, as they result in truncated proteins which may be misfolded or form dominant negative alleles (7,8) (**Figure 1**). This justifies an evolutionary pressure for cells to contain mRNA surveillance pathways that remove transcripts bearing frameshifts. Suppression of frameshift errors is thought to be one of the major roles of the mRNA quality control machinery (9).

### Nonsense-mediated decay for removing frameshifting errors

In eukaryotes, nonsense-mediated decay (NMD) is a conserved mRNA surveillance pathway that is often assumed to fulfill a frameshift-removing role (10). This follows from the observation that frameshifts generate premature termination codons (PTCs), recognition of

51 which targets the transcript for NMD. However, the quantitative effects of NMD, when  
 52 measured, are often small (11,12). In addition, a large fraction native transcripts (between  
 53 5%-30% depending on the genome) are targeted by NMD (13). In the context of mRNA  
 54 quality control, these are poor evidence for NMD being an effective quality control pathway.  
 55

56 The mechanism of NMD may be species-specific (10,12) and has even been proposed  
 57 to be a passive result of the degradation of unprotected transcripts (14). In yeast, NMD is  
 58 thought to act on long 3'UTRs (15,16), so that transcripts bearing 3'UTRs longer than 250  
 59 nucleotides are targeted by NMD (**Figure 1**). Recent work has shown that this is mostly true  
 60 and, importantly, the strength of NMD depends linearly on 3'UTR length (11) (**Figure 3B**).  
 61 However, native 3'UTR lengths are highly variable, ranging from 0 to 1461 nucleotides (17).  
 62 Frameshifts in native transcripts with short 3'UTRs are unlikely to result in efficient NMD.

63  
 64 These data suggest that NMD is both inaccurate and inefficient discretizing “correct” vs  
 65 “incorrect” transcripts. We propose that an efficient quality control pathway should be better  
 66 able to distinguish and degrade incorrect transcripts.

67

## 68 **Results**

### 69 **Codon bias and mRNA quality control**

70

71 Recent work (11) provides an unexpected clue towards understanding mRNA quality  
 72 control. Two mechanisms of co-translational regulation, NMD and codon bias-dependent  
 73 mRNA expression (18,19) (**Figure 2A**) are genetically linked; both pathways are regulated  
 74 by the DEAD-box RNA helicase Dbp2 and by promoter architecture. A quantitative analysis  
 75 of the impact of these pathways on mRNA levels gives rise to the hypothesis that they may

76 act in a synergistic manner to remove transcripts with frameshifts. In addition to generating a  
 77 PTC, frameshifts generate a second signal of “wrong transcript”: a run of normally out-of-  
 78 frame codons between the frameshift and the PTC that are now translated (**Figure 1**). Below  
 79 we provide computational support of this hypothesis.

80

## 81 **The meaning and role of codon bias**

82

83 All transcriptomes exhibit imbalances in the synonymous codons used for each amino acid.  
 84 Not all synonymous codons are equally abundant, a phenomena called “codon bias”(20,21).  
 85 Highly expressed genes use codons translated by abundant tRNAs (22) and are coded by  
 86 optimized codons (**Figure 2**), leading to efficient protein synthesis. Highly expressed genes  
 87 with efficient translation initiation but with suboptimal codon usage are deleterious and affect  
 88 the expression of the rest of the proteome (23).

89

90 It was previously noted that use of optimal codons increased not only protein levels, but also  
 91 mRNA levels (24–26), suggesting that ribosome speed might regulate mRNA stability.  
 92 Recently, a pathway that involves the DEAD-box RNA helicase Dhh1 was found to target  
 93 transcripts with suboptimal codon usage for decay in a translation-dependent manner (18,27).  
 94 Even short stretches of twelve suboptimal codons reduce mRNA levels (19), likely due to  
 95 slower translation (28).

96

97 While most genes do not have highly optimized codon usage, the majority of the yeast  
 98 transcriptome is populated by highly optimized mRNAs (**Figure 2B**). The top 10% of  
 99 expressed genes have highly optimized codon usage. In yeast these genes account for 77% of  
 100 the transcripts in a cell. Translational selection (29) will result in the optimized codon usage

of constitutively highly expressed genes but will act less efficiently on genes with lower expression, genes that are rarely expressed, and of course on out-of-frame codons.

# **Codon optimality for removing frameshifting errors**

In addition to producing PTCs, frameshifts are likely to introduce a stretch of non-optimized codons at the 3' end of the ORF (**Figure 1**). In genes with optimized codons, this will result in a sudden changes in translation efficiency after the frameshift, which will reduce protein synthesis and target the transcript for decay (**Figure 3A**). This reasoning follows the observation that the impact of low codon optimality on translation efficiency and mRNA decay is local and can act over as few as twelve codons (19,28). The magnitude of the decrease in codon optimality will be highest for transcripts with high codon optimization (most of the mRNAs in the cell (**Figure 2B**)), which correspond to highly expressed genes that likely bear most of the frameshifts (assuming a uniform distribution of errors across transcripts (1)). Our hypothesis is that frameshift-removing mechanisms are especially relevant for such highly-expressed genes. Furthermore, the impact of low codon optimality close to the 3' end of the mRNA is higher ([Mishima and Tomari 2016](#)). In the case of a frameshift, the enrichment of non-optimal codons should be towards the end of the ORF, which predicts that the destabilizing effect will be even stronger.

To compare the role of NMD and codon bias in mRNA quality control we ran a frameshift-introducing simulation on yeast transcripts. We generated random single-base deletions in native transcripts and calculated codon optimality (tRNA adaptation index, tAI (30)) and 3'UTR length with and without the frameshift. Because errors occur on a per transcript basis,

each gene received a number of errors proportional to its mRNA expression level (**Figure 3C**).

We found that almost all frameshifts produce a large decrease in tAI after the mutation (**Figure 3D**). The change in tAI range due to frameshifts decreases mRNA levels (11) (**Figure 3A**). In contrast, ~50% of errors produce 3'UTRs in the range of native 3'UTR lengths (**Figure 3D**), likely unaffected by NMD (11) (**Figure 3B**). These findings indicate that selection for codon-optimality (which acts on highly expressed genes) can be a robust way to define “correct transcripts” and thus remove transcripts that contain frameshifts

## Discussion

Cells need to remove transcripts with errors; mutants with increased error rates or that are unable to remove transcripts with errors grow slowly (1,31). Frameshift errors are likely to be deleterious, both by generating deleterious protein isoforms, and because suboptimal codons titrate away both tRNAs and ribosomes (23,32). However, both the sequence features that cells recognize and the mechanisms by which they do so remain poorly understood. Many open questions remain.

NMD is weak (11,12) and affects 5-20% of the native transcriptome (13), so it may be both inefficient and unspecific for removing errors. Removing transcripts with low codon optimality may be more accurate and efficient. This is consistent with the fact that NMD strength follows a linear relationship with 3'UTR length, while codon optimality has a sigmoidal impact on expression (**Figure 3**). Small changes in codon optimality can lead to a large decrease in expression.

150

151 We observe that ~50% of frameshifts generate 3'UTRs within the range of native transcripts,  
152 likely unaffected by NMD. This exemplifies how a model based on a qualitative basis  
153 ("NMD removes frameshifts *because* these have longer 3'UTRs") can fail to predict of the  
154 quantitative behavior of a system.

155

156 Our recent work suggests a genetic link between codon bias and NMD (11). Here we report a  
157 possible explanation of this interaction, but it remains to be seen which is the impact on  
158 measured expression levels of both processes. The mechanism of this link also remains to be  
159 established.

160

161 In frameshifted mRNAs, the quantitative impact of the low-tAI stretches of ORF in  
162 expression remains elusive. It will be interesting to see if they can explain more or less  
163 quality control than NMD. In addition, the effect of codon bias on expression is expected to  
164 impact protein levels (20,23), not only mRNA. This predicts that the impact of codon bias on  
165 expression is higher than reported here (**Figure 3A**), which is not true for NMD. This could  
166 explain why we observe a lot of splice isoforms that have PTCs in humans, which may arise  
167 from frameshifting splicing errors. NMD does not remove them (as we can detect them), but  
168 it is likely that they have lower codon adaptation and reduced protein levels.

169

170 Finally, this work raises a possible explanation for an adaptive benefit of imbalanced tRNA  
171 repertoires (22), which would confer the ability to degrade transcripts that are not supposed to  
172 be highly expressed. It is almost certain that cells avoid selecting the expression of ORFs  
173 with a random composition of codons. Frameshifts generate such random stretches, that are  
174 likely targeted for decay. Thus, there may be an evolutionary pressure for imbalanced tRNA

repertoires to ensure proper mechanisms of mRNA quality control. It will be interesting to determine if this process has driven the evolution of codon bias and codon-usage associated mRNA stability, or it is a passive result due to the fact that almost any frameshift will reduce the optimality of the already very optimal genes.

## Methods

### Codon bias measurements

Codon bias was approximated by calculating the tRNA adaptation index (tAI) ([dos Reis et al. 2003](#)) for each open reading frame (ORF, either native of the yeast transcriptome or simulated). In order to generate random ORFs we simulated random transcription start sites (TSS) across the whole genome of *Saccharomyces cerevisiae* ([Cherry et al. 2012](#)) and generated the ORF starting at the first ATG from the TSS. tAI was calculated on each of them in order to measure the codon bias of random coding sequences.

### mRNA expression weighting

In order to approximate *per-transcript* distributions (of tAI and 3'UTR length) we weighted each gene by the sum of the TPM expression obtained from multiple RNA-seq experiments (generated in ([Carey 2015](#))). This means that each gene has a weight in the distribution which is proportional to its mRNA expression.

### Relationship between ORF features and expression

We obtained data about the relationship between several ORF features (3'UTR length and tAI) and mRNA expression from an existing dataset ([Espinar et al. 2018](#)). It includes the expression measurements for a library of ~10,000 ORFs randomly generated from the yeast genome. In order to determine the impact of 3'UTR length on NMD we generated the same library on a UPF1 deletion strain, as described before ([Espinar et al. 2018](#)).



200

## 201 **Simulating frameshifts.**

202 As an example of frameshift, we simulated  $10^5$  random single-base deletions on yeast native  
 203 transcripts. Each gene includes a number of mutations proportional to its expression level (as  
 204 explained in *mRNA expression weighting*). For each error (and corresponding native  
 205 transcript) we calculated tAI between the frameshift and the PTC (local tAI) and the resulting  
 206 3'UTR length.

207

## 208 **Data availability:**

209 All code and data are at [https://github.com/MikiSchikora/CodonBias\\_QualityControl](https://github.com/MikiSchikora/CodonBias_QualityControl)

210

211

## 212 **Funding details:**

213 This work was supported by Ministerio de Economía y Competitividad (MINECO) and the Fondo  
 214 Europeo de Desarrollo Regional (FEDER) BFU2015-68351-P (MINECO / ERDF EU), AGAUR  
 215 (2014SGR0974 and 2017SGR1054) and the Unidad de Excelencia María de Maeztu, funded by  
 216 MINECO (MDM-2014-0370).

217

## 218 **Disclosure statement**

219 The authors declare that they have no competing interests.

220

## 221 **Figure legends**

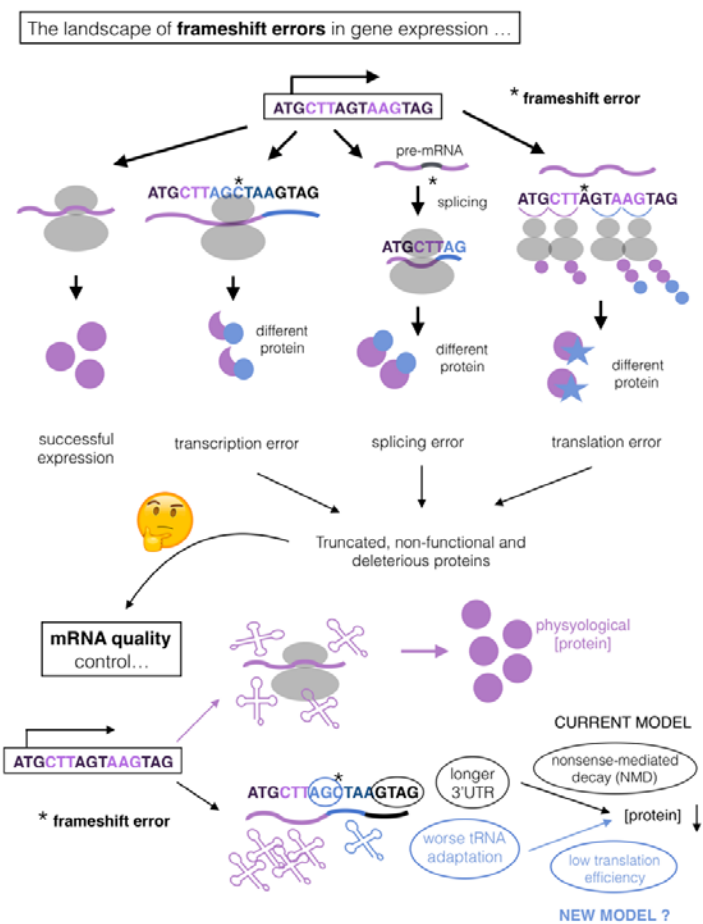

222

223 **Figure 1: The impact of frameshifting errors in gene expression.** Gene expression can  
224 result in frameshifting errors (indicated as \*) due to transcriptional insertion/deletion  
225 epimutations, errors in splicing or ribosomal slippage during translation (top). These  
226 processes potentially generate deleterious proteins, which justifies the need of mRNA quality  
227 control mechanisms in cells (bottom). In the absence of errors, mRNAs are translated leading  
228 to physiological protein levels. The current model indicates that frameshifting errors generate  
229 Premature Termination Codons (PTC) that trigger Nonsense-Mediated Decay (NMD) on  
230 them, mainly because of the generated long 3'UTR (in yeast). Our hypothesis is that NMD is  
231 often nonspecific for errors, so that other quality control mechanisms must exist. We note  
232 that another signal of “incorrectness” may appear in transcripts with frameshifts: a stretch of  
233 poorly-optimized codons (in blue, indicating worse tRNA adaptation) between the error and  
234 the PTC. This should lead to reduced translation efficiency, mRNA decay and lower protein  
235 concentrations of the frameshifted transcript.

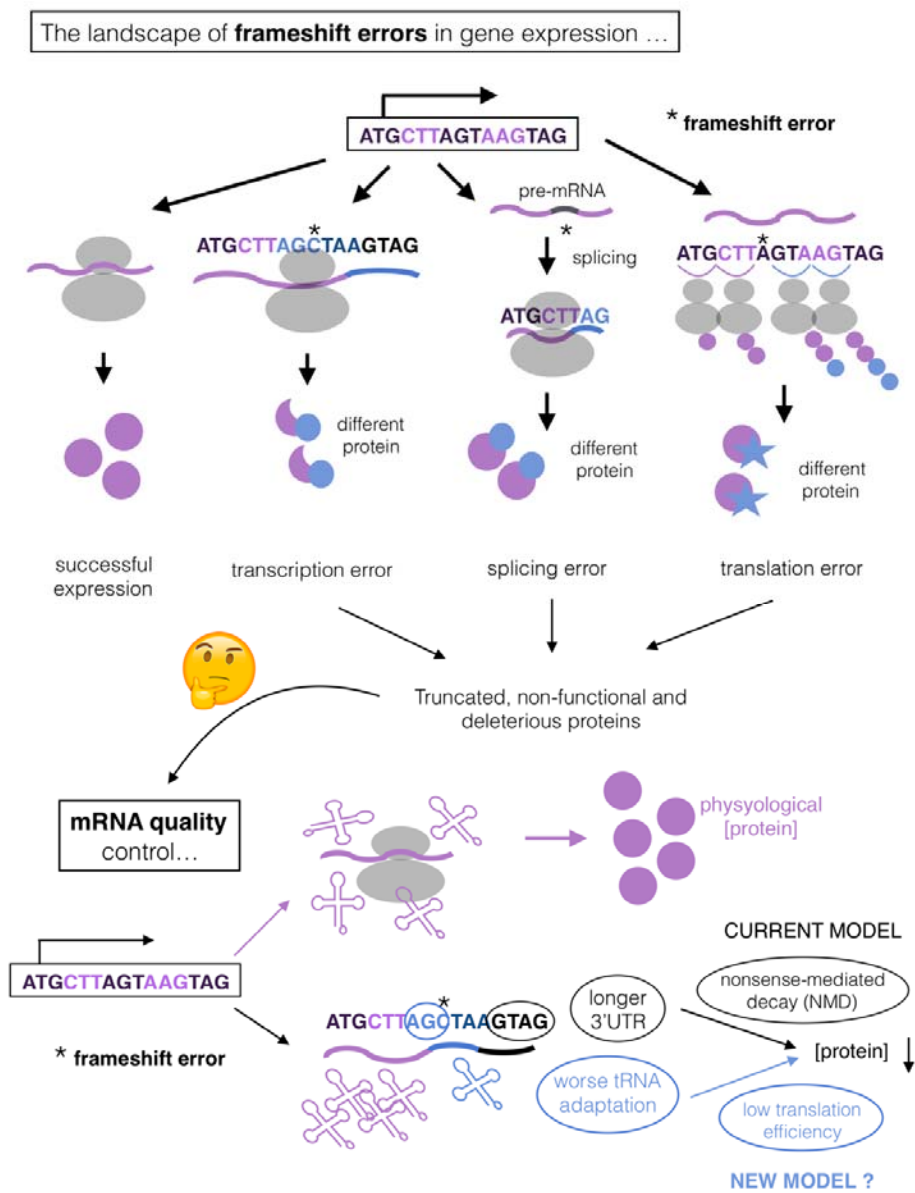

236

237 **Figure 2: The meaning of codon bias in the transcriptome.** (A) Highly expressed genes  
238 are often selected to have optimized codons in agreement with the cellular tRNA pool,  
239 allowing efficient translation of them (purple). This is known as “translational selection” (20–  
240 23). On the other hand, genes with a poor codon optimization are inefficiently translated and  
241 targeted for mRNA decay (blue) (18). (B) Top: in yeast, most native *genes* (purple) exhibit a  
242 tRNA Adaptation Index (tAI, as a measure of codon optimality) in the range of ORFs  
243 predicted from random transcription throughout the genome (blue). Such random ORFs  
244 simulate the absence of codon bias in terms of tRNA adaptation. A small fraction of *genes*  
245 have non-random tAI, which corresponds to genes “selected for translation”. Bottom: most  
246 native *transcripts* (purple) have high tAI, as compared to random ORFs (blue). This  
247 histogram was generated weighting each gene by mRNA expression level (which is  
248 exponentially distributed), which indicates the per-transcript distribution of tAI.

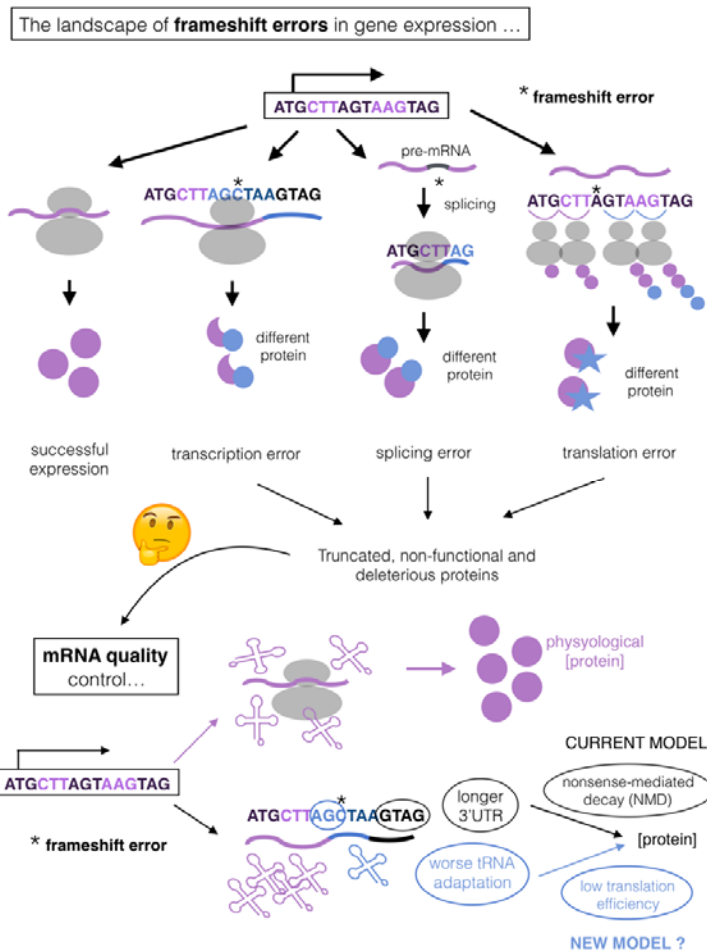

249

250 **Figure 3: Codon bias can implement quality control of mRNAs with frameshifts. (A)** tAI  
 251 follows a negative sigmoidal relationship with mRNA expression levels. Expression was  
 252 calculated as the  $\log_2$ -ratio between mRNA and DNA abundance of a synthetic ORF library  
 253 of random fragments from the yeast genome, expressed in a plasmid (11). The dashed line  
 254 represent a threshold in which decreasing tAI reduces expression. **(B)** NMD strength follows  
 255 a positive linear relationship with 3'UTR length. NMD was measured as the expression  
 256 (calculated as in A)  $\log_2$ -ratio between identical ORF libraries built in a *Δupf1* or a *wt* strain  
 257 (11). This ratio indicates the impact of NMD for each sequence in the library (which has  
 258 variable 3'UTR lengths), as UPF1 is responsible for NMD (10). The dashed line represent a  
 259 threshold in which increasing 3'UTR generates NMD (positive values in the Y axis). **(C)** A  
 260 pipeline for predicting the impact of NMD and codon on frameshift quality control. As an  
 261 example of frameshift, we simulated  $10^5$  random single-base deletions on native transcripts.  
 262 Each gene includes a number of mutations proportional to its expression level. For each error  
 263 (and corresponding native transcript) we calculated tAI between the frameshift and the PTC  
 264 (local tAI) and the resulting 3'UTR length. We used these as measures of the impact of error  
 265 on translation efficiency and/or NMD targeting. **(D)** Transcripts with frameshifts (blue) have  
 266 lower tAI (top) and longer 3'UTRs (bottom), when compared to native mRNAs (purple). The  
 267 dashed lines represent the thresholds described in A,B.

268

## 269 **References**

- 270 1. Gout J-F, Li W, Fritsch C, Li A, Haroon S, Singh L, et al. The landscape of transcription  
271 errors in eukaryotic cells. *Science Advances*. 2017 Oct 1;3(10):e1701484.
- 272 2. Gout J-F, Thomas WK, Smith Z, Okamoto K, Lynch M. Large-scale detection of in vivo  
273 transcription errors. *Proc Natl Acad Sci U S A*. 2013 Nov 12;110(46):18584–9.
- 274 3. Carey LB. RNA polymerase errors cause splicing defects and can be regulated by  
275 differential expression of RNA polymerase subunits. *Elife* [Internet]. 2015 Dec 10;4.  
276 Available from: <http://dx.doi.org/10.7554/eLife.09945>
- 277 4. Milo R, Jorgensen P, Moran U, Weber G, Springer M. BioNumbers--the database of key  
278 numbers in molecular and cell biology. *Nucleic Acids Res*. 2010 Jan;38(Database  
279 issue):D750–3.
- 280 5. Imashimizu M, Oshima T, Lubkowska L, Kashlev M. Direct assessment of transcription  
281 fidelity by high-resolution RNA sequencing. *Nucleic Acids Res*. 2013 Oct  
282 1;41(19):9090–104.
- 283 6. Fox-Walsh KL, Hertel KJ. Splice-site pairing is an intrinsically high fidelity process.  
284 *Proc Natl Acad Sci U S A*. 2009 Feb 10;106(6):1766–71.
- 285 7. Weterman MAJ, Sorrentino V, Kasher PR, Jakobs ME, van Engelen BGM, Fluiters K, et  
286 al. A frameshift mutation in LRSAM1 is responsible for a dominant hereditary  
287 polyneuropathy. *Hum Mol Genet*. 2012 Jan 15;21(2):358–70.
- 288 8. Sadhu MJ, Bloom JS, Day L, Siegel JJ, Kosuri S, Kruglyak L. Highly parallel genome  
289 variant engineering with CRISPR–Cas9. *Nat Genet*. 2018 Apr 9;50(4):510–4.
- 290 9. Isken O, Maquat LE. Quality control of eukaryotic mRNA: safeguarding cells from  
291 abnormal mRNA function. *Genes Dev*. 2007 Aug 1;21(15):1833–3856.
- 292 10. Behm-Ansant I, Kashima I, Rehwinkel J, Saulière J, Wittkopp N, Izaurralde E. mRNA  
293 quality control: An ancient machinery recognizes and degrades mRNAs with nonsense  
294 codons. *FEBS Lett*. 2007 Jun 19;581(15):2845–53.
- 295 11. Espinar L, Schikora Tamarit MÀ, Domingo J, Carey LB. Promoter architecture  
296 determines cotranslational regulation of mRNA. *Genome Res* [Internet]. 2018 Mar 22;  
297 Available from: <http://dx.doi.org/10.1101/gr.230458.117>
- 298 12. Lindeboom RGH, Supek F, Lehner B. The rules and impact of nonsense-mediated  
299 mRNA decay in human cancers. *Nat Genet* [Internet]. 2016 Sep 12; Available from:  
300 <http://dx.doi.org/10.1038/ng.3664>
- 301 13. Peccarelli M, Kebaara BW. Regulation of natural mRNAs by the nonsense-mediated  
302 mRNA decay pathway. *Eukaryot Cell*. 2014 Sep;13(9):1126–35.
- 303 14. Brogna S, McLeod T, Petric M. The Meaning of NMD: Translate or Perish. *Trends*

Genet. 2016 Jul;32(7):395–407.

15. Zhang J, Sun X, Qian Y, LaDuca JP, Maquat LE. At least one intron is required for the nonsense-mediated decay of triosephosphate isomerase mRNA: a possible link between nuclear splicing and cytoplasmic translation. *Mol Cell Biol*. 1998 Sep;18(9):5272–83.
16. Amrani N, Ganesan R, Kervestin S, Mangus DA, Ghosh S, Jacobson A. A faux 3'-UTR promotes aberrant termination and triggers nonsense-mediated mRNA decay. *Nature*. 2004 Nov 4;432(7013):112–8.
17. Nagalakshmi U, Wang Z, Waern K, Shou C, Raha D, Gerstein M, et al. The transcriptional landscape of the yeast genome defined by RNA sequencing. *Science*. 2008 Jun 6;320(5881):1344–9.
18. Radhakrishnan A, Chen Y-H, Martin S, Alhusaini N, Green R, Collier J. The DEAD-Box Protein Dhh1p Couples mRNA Decay and Translation by Monitoring Codon Optimality. *Cell* [Internet]. Available from: <http://www.sciencedirect.com/science/article/pii/S0092867416311503>
19. Chen S, Li K, Cao W, Wang J, Zhao T, Huan Q, et al. Codon-Resolution Analysis Reveals a Direct and Context-Dependent Impact of Individual Synonymous Mutations on mRNA Level. *Mol Biol Evol*. 2017 Nov 1;34(11):2944–58.
20. Ikemura T. Codon usage and tRNA content in unicellular and multicellular organisms. *Mol Biol Evol*. 1985 Jan;2(1):13–34.
21. Grantham R. Working of the genetic code. *Trends Biochem Sci*. 1980 Dec 1;5(12):327–31.
22. Novoa EM, Ribas de Pouplana L. Speeding with control: codon usage, tRNAs, and ribosomes. *Trends Genet*. 2012 Nov;28(11):574–81.
23. Frumkin I, Lajoie MJ, Gregg CJ, Hornung G, Church GM, Pilpel Y. Codon usage of highly expressed genes affects proteome-wide translation efficiency. *Proc Natl Acad Sci U S A* [Internet]. 2018 May 7; Available from: <http://dx.doi.org/10.1073/pnas.1719375115>
24. Te'o VS, Cziferszky AE, Bergquist PL, Nevalainen KM. Codon optimization of xylanase gene xynB from the thermophilic bacterium *Dictyoglomus thermophilum* for expression in the filamentous fungus *Trichoderma reesei*. *FEMS Microbiol Lett*. 2000 Sep 1;190(1):13–9.
25. Presnyak V, Alhusaini N, Chen Y-H, Martin S, Morris N, Kline N, et al. Codon optimality is a major determinant of mRNA stability. *Cell*. 2015 Mar 12;160(6):1111–24.
26. Boël G, Letso R, Neely H, Price WN, Wong K-H, Su M, et al. Codon influence on protein expression in *E. coli* correlates with mRNA levels. *Nature*. 2016 Jan 21;529(7586):358–63.
27. Harigaya Y, Parker R. Codon optimality and mRNA decay. *Cell Res*. 2016 Dec;26(12):1269–70.

- 343 28. Yu C-H, Dang Y, Zhou Z, Wu C, Zhao F, Sachs MS, et al. Codon Usage Influences the  
344 Local Rate of Translation Elongation to Regulate Co-translational Protein Folding. *Mol*  
345 *Cell*. 2015 Sep 3;59(5):744–54.
- 346 29. Akashi H, Eyre-Walker A. Translational selection and molecular evolution. *Curr Opin*  
347 *Genet Dev*. 1998 Dec;8(6):688–93.
- 348 30. dos Reis M, Wernisch L, Savva R. Unexpected correlations between gene expression  
349 and codon usage bias from microarray data for the whole *Escherichia coli* K-12 genome.  
350 *Nucleic Acids Res*. 2003 Dec 1;31(23):6976–85.
- 351 31. Cherry JM, Hong EL, Amundsen C, Balakrishnan R, Binkley G, Chan ET, et al.  
352 *Saccharomyces* Genome Database: the genomics resource of budding yeast. *Nucleic*  
353 *Acids Res*. 2012 Jan;40(Database issue):D700–5.
- 354 32. Shah P, Ding Y, Niemczyk M, Kudla G, Plotkin JB. Rate-limiting steps in yeast protein  
355 translation. *Cell*. 2013 Jun 20;153(7):1589–601.

356
